# Supplementary material
Source: PubMed Central journal article supplement (PMC3904614)
Supplement: JCI70291sd.pdf [file JCI70291sd.pdf]

**A**

| Gene Name                              | Gene Symbol   | p (RA)                | FC (RA) | p (BMS)               | FC (BMS) |
|----------------------------------------|---------------|-----------------------|---------|-----------------------|----------|
| Cysteine and glycine-rich protein 1    | <i>Csrp1</i>  | $5.92 \times 10^{-7}$ | -1.7    | $9.62 \times 10^{-7}$ | 1.9      |
| Cysteine and glycine-rich protein 2    | <i>Csrp2</i>  | $1.12 \times 10^{-2}$ | -1.2    | $7.65 \times 10^{-3}$ | 1.4      |
| Actin, alpha 2, smooth muscle, aorta   | <i>Acta2</i>  | $1.43 \times 10^{-1}$ | -2.4    | $1.88 \times 10^{-2}$ | 2.9      |
| Actin, gamma 2, smooth muscle, enteric | <i>Actg2</i>  | $1.42 \times 10^{-1}$ | -1.5    | $6.08 \times 10^{-4}$ | 2.1      |
| Transgelin                             | <i>Tagln</i>  | $8.40 \times 10^{-1}$ | -1.0    | $6.42 \times 10^{-9}$ | 2.8      |
| Transgelin 2                           | <i>Tagln2</i> | $2.21 \times 10^{-1}$ | -1.1    | $2.52 \times 10^{-4}$ | 1.5      |
| Myosin heavy chain 11, smooth muscle   | <i>Myh11</i>  | $3.10 \times 10^{-1}$ | -1.8    | $7.84 \times 10^{-3}$ | 1.2      |
| Calponin 2                             | <i>Cnn2</i>   | $6.71 \times 10^{-1}$ | -1.0    | $6.29 \times 10^{-4}$ | 1.4      |

**B**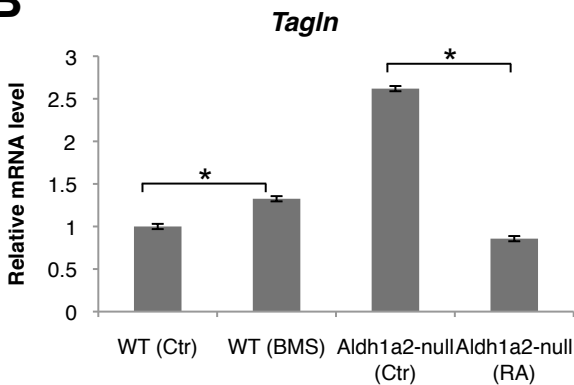**C**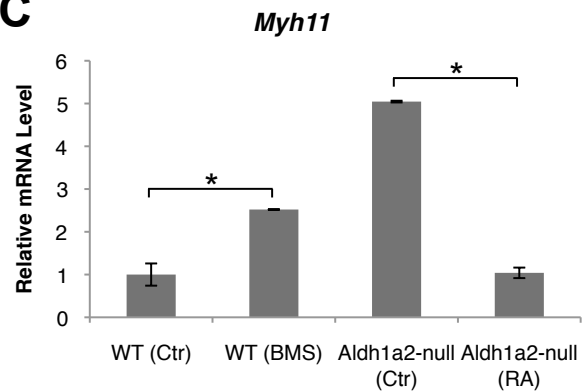

**Supplemental Figure 1.** Disruption of RA signaling results in upregulation of SM markers in the foregut at the onset of lung development. (A) Gene array analysis of a pharmacological (BMS: RAR antagonist) and a genetic (*Aldh1a2*-null mice) model of RA deficiency using mouse embryonic foregut explants cultured for 24h (32). p value and fold change (FC) of RA (mutant non-rescued vs. rescued by RA) and BMS (WT control vs RAR antagonist). In both models, RA deficiency is associated with up-regulation of SM markers. (B-C) qPCR confirms increased expression of SM markers (*Tagln* and *Myh11*) by disruption of RA signaling (BMS or *Aldh1a2*<sup>-/-</sup>) and down-regulation by supplementation with RA. Asterisks: significance at p<0.05 (mean,  $\pm$  se; n=3 explants per condition).

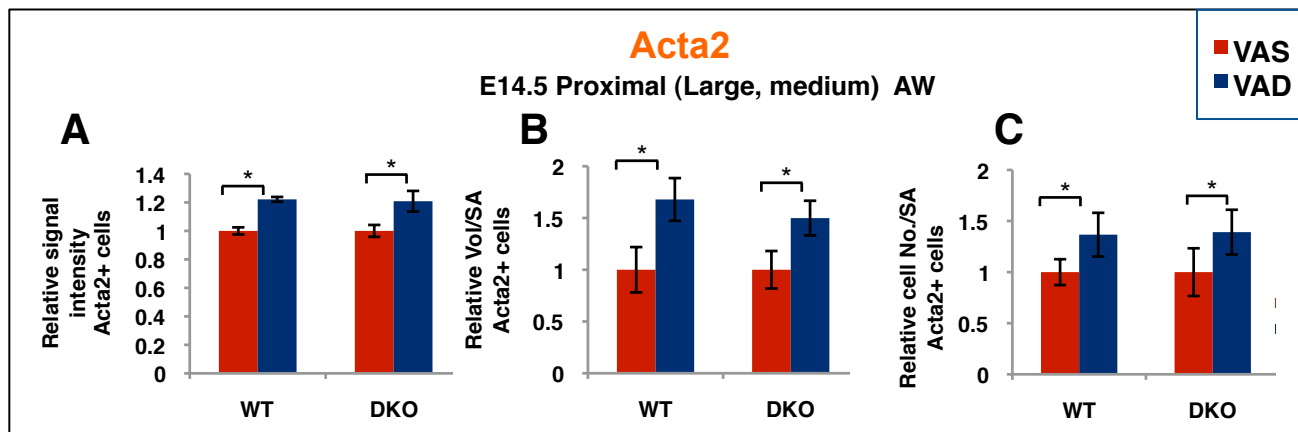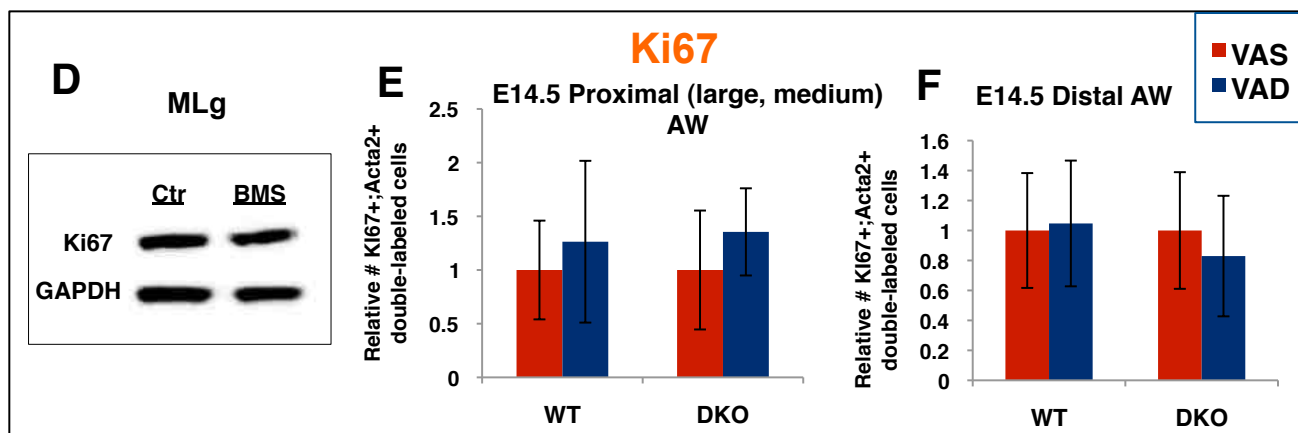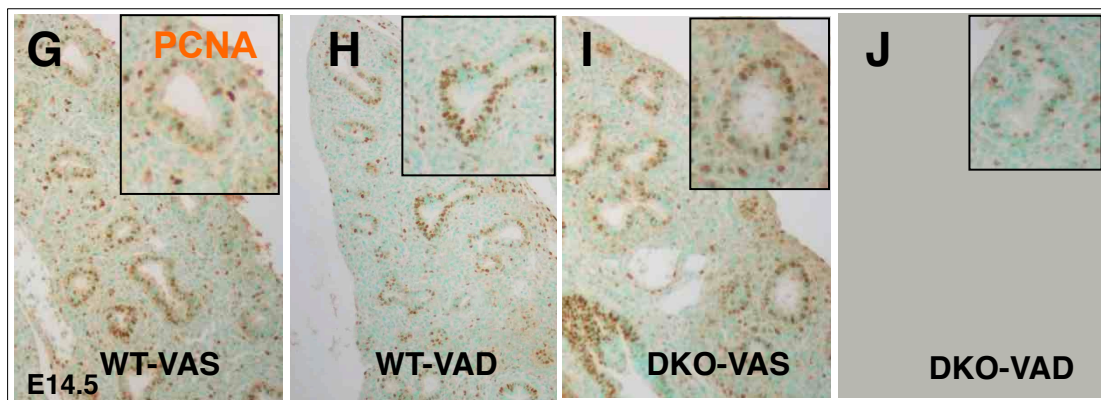

**Supplemental Figure 2.** The abnormal SM phenotype by deficient RA signaling is not associated with changes in cell proliferation. (A-C) Quantitative assessment of Acta2 IHC in proximal airways (AW) of WT and *DKO* E14.5 mouse lungs: increase in the relative signal intensity, relative volume per surface area (SA), and relative number per SA of Acta2-positive cells in VAD mice compared to VAS. (D-F) No significant changes in cell proliferation as seen by Ki67 Western blot in MLg cells control and BMS (D) and IHC-morphometric assessment of the relative number of Ki67;Acta2 double-labeled cells (E-F) in proximal and distal airways of E14.5 WT and *DKO* lungs (VAS or VAD). (G-J) PCNA IHC in E14.5 lungs further shows no obvious changes in proliferation between groups. Asterisks: significance at  $p < 0.05$  (mean,  $\pm$  se;  $n = 3-4$  explants per condition).

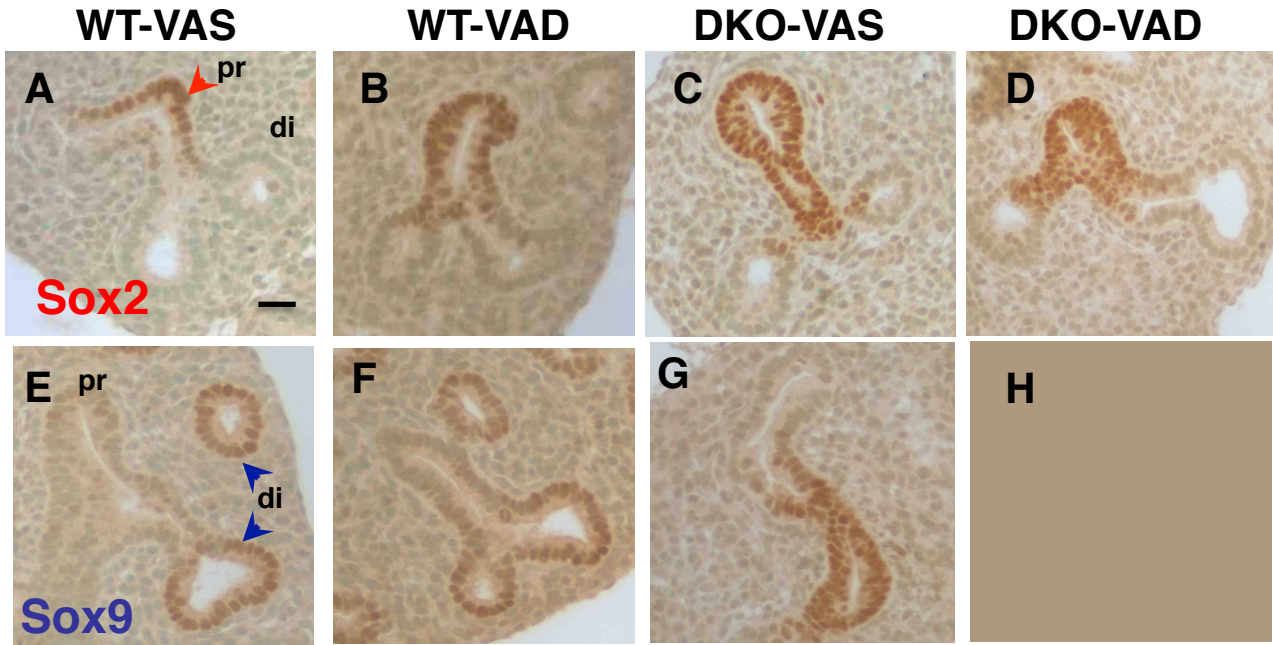

**Supplemental Figure 3.** The SM phenotype of RA-deficient lungs is not associated with changes in lung epithelial patterning. IHC of Sox2 (A-D) and Sox9 (E-H) showing labeling of the proximal (pr) and distal (di) epithelium, respectively in E14.5 lungs from WT (VAS, VAD) and DKO (VAS, VAD) mice. No difference in intensity or proximal-distal distribution of these markers among the groups (n=3 per condition). Scale bar in A: 80  $\mu$ m.

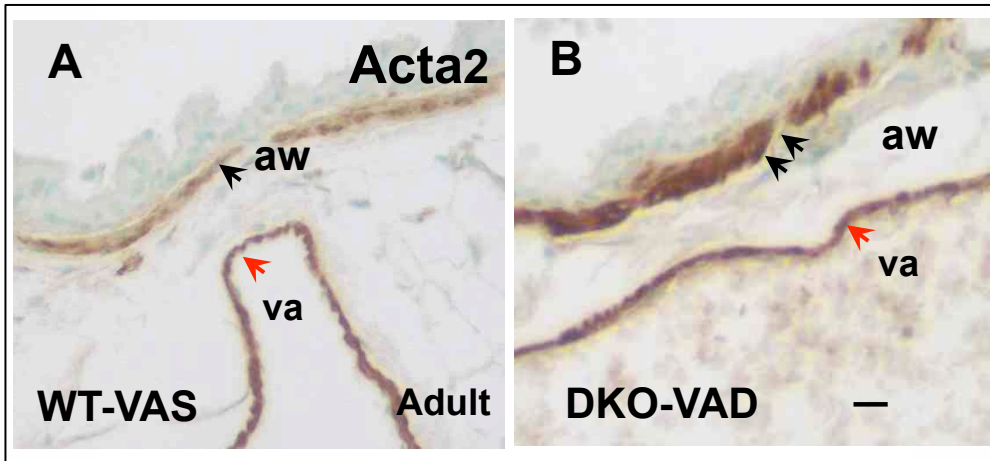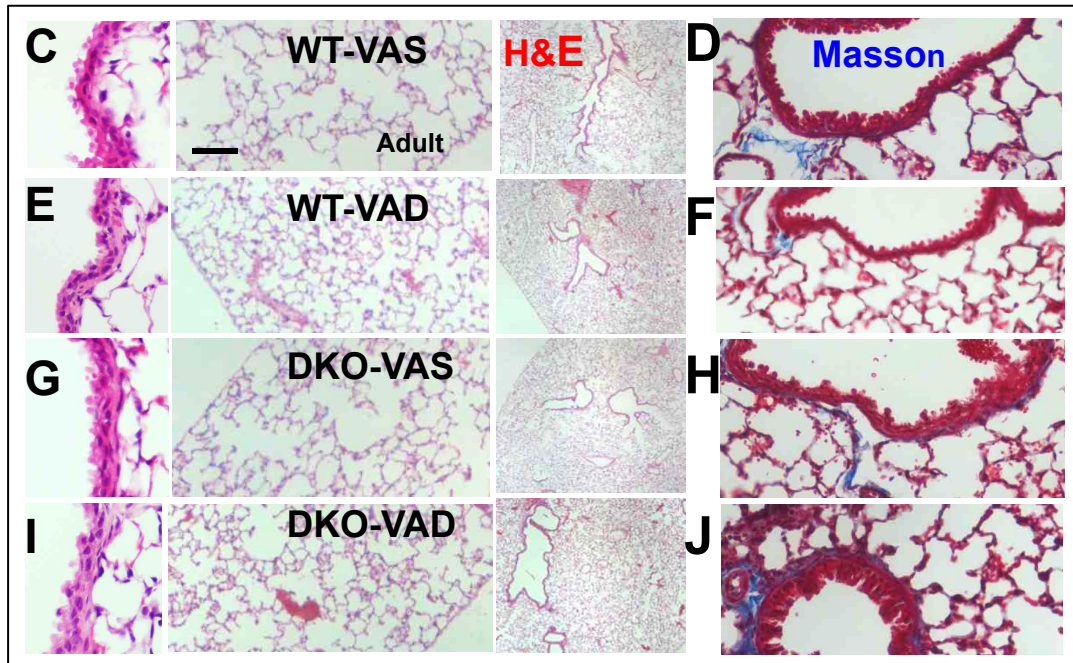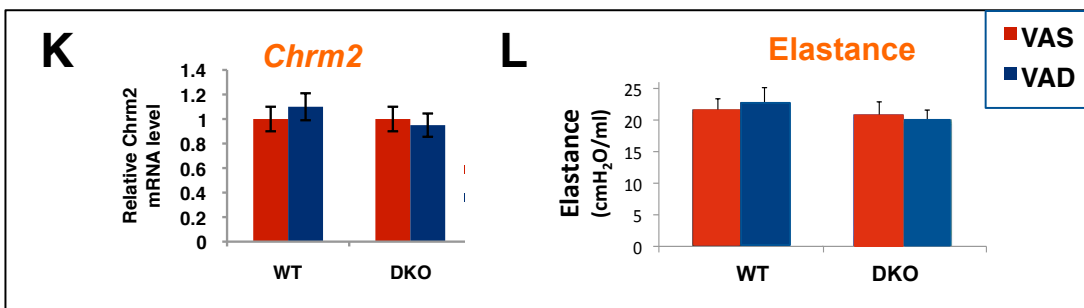

**Supplemental Figure 4.** Effects of pre-natal Vitamin A deficiency in the adult lung. (A, B) Acta2 IHC: major increase in expression in airway SM but not in vascular (va) SM in VAD-DKO mice compared to WT-VAS (representative section). (C, E, G, I) H&E, no obvious morphological changes in the alveolar spaces between groups. (D, F, H, J) Masson staining: no evidence of aberrant extra-cellular matrix deposition among groups. (K-L) No significant changes in muscarinic receptor (*Chrm2*) expression by qRT-PCR or changes in lung elastance when VAS and VAD groups are compared in WT and DKO mice. Scale bars in B, C: 24  $\mu$ m and 40  $\mu$ m
